# Supplementary material
Source: MDPI journal article supplement (https://www.mdpi.com/2075-163X/11/1/53)
Supplement: s1 [file s1]

## Supplementary Materials

# Preferential elimination of Ba<sup>2+</sup> through irreversible biogenic manganese oxide sequestration

Yukinori Tani<sup>1,2\*</sup>, Satomi Kakinuma<sup>1</sup>, Jianing Chang<sup>2</sup>, Kazuya Tanaka<sup>3</sup>, and Naoyuki Miyata<sup>4</sup>

<sup>1</sup> Department of Environmental and Life Sciences, School of Food and Nutritional Sciences, University of Shizuoka, 52-1 Yada, Shizuoka 422-8526, Japan; [taniy@u-shizuoka-ken.ac.jp](mailto:taniy@u-shizuoka-ken.ac.jp) (Y.T.); [st.kakinuma@gmail.com](mailto:st.kakinuma@gmail.com) (S.K.)

<sup>2</sup> Department of Environmental Health Sciences, Graduate School of Nutritional and Environmental Sciences, University of Shizuoka, 52-1 Yada, Shizuoka 422-8526, Japan; [jianing\\_ch0802@sina.com](mailto:jianing_ch0802@sina.com) (J.C.)

<sup>3</sup> Advanced Science Research Center, Japan Atomic Energy Agency, Tokai, Ibaraki 319-1195, Japan; [tanaka.kazuya@jaea.go.jp](mailto:tanaka.kazuya@jaea.go.jp) (K.T.)

<sup>4</sup> Department of Biological Environment, Akita Prefectural University, Shimoshinjo-Nakano, Akita 010-0195, Japan; [nmiyata@akita-pu.ac.jp](mailto:nmiyata@akita-pu.ac.jp) (N.M.)

\* Correspondence: [taniy@u-shizuoka-ken.ac.jp](mailto:taniy@u-shizuoka-ken.ac.jp); Tel.: +81-54-264-5797

Table S1-S3  
Figure S1-S6

**Table S1** Data summary of sequestration experiments for Ba<sup>2+</sup> by newly formed and heated BMOs in 20 mM HEPES (pH 7.0) with or without exogenous Mn<sup>2+</sup>

| Condition                                                                  |       | Sequestration efficiency (%) (added ions; mM) |             |                  |             | Two-step extraction            |                     |                  |                  |                     |                  |
|----------------------------------------------------------------------------|-------|-----------------------------------------------|-------------|------------------|-------------|--------------------------------|---------------------|------------------|------------------|---------------------|------------------|
|                                                                            |       | Ba <sup>2+</sup>                              |             | Mn <sup>2+</sup> |             | Total Ba <sup>2+</sup><br>(mM) | Exchangeable<br>(%) | Reducible<br>(%) | Total Mn<br>(mM) | Exchangeable<br>(%) | Reducible<br>(%) |
| Newly formed <sup>d</sup><br>Aerobic<br>Only Mn <sup>2+</sup>              | 1st   | -                                             |             | >99              | (1.01±0.00) | -                              | -                   | -                | 2.10±0.01        | 15.8±0.1            | 84.2±0.1         |
|                                                                            | 2nd   | -                                             |             | >99              | (1.02±0.01) | -                              | -                   | -                | 3.00±0.02        | 12.5±0.1            | 87.5±0.1         |
|                                                                            | 3rd   | -                                             |             | 98.7±0.6         | (1.00±0.00) | -                              | -                   | -                | 4.00±0.03        | 13.2±0.0            | 86.8±0.0         |
|                                                                            | Total | -                                             |             | >99              |             | -                              | -                   | -                |                  |                     |                  |
| Newly formed <sup>d</sup><br>Aerobic<br>Only Ba <sup>2+</sup>              | 1st   | 17.7±0.7                                      | (1.00±0.00) | -                |             | 0.18±0.00                      | 93.7±0.2            | 6.3±0.2          | 1.02±0.00        | 7.5±0.1             | 92.5±0.1         |
|                                                                            | 2nd   | 0.6±0.4                                       | (1.01±0.00) | -                |             | 0.19±0.00                      | 93.9±0.1            | 6.1±0.1          | 1.02±0.01        | 8.0±0.3             | 92.0±0.3         |
|                                                                            | 3rd   | 0.7±0.3                                       | (0.99±0.00) | -                |             | 0.20±0.00                      | 93.2±0.9            | 6.8±0.9          | 1.04±0.00        | 7.3±0.2             | 92.6±0.2         |
|                                                                            | Total | 6.4±0.2                                       |             | -                |             |                                |                     |                  |                  |                     |                  |
| Newly formed <sup>d</sup><br>Aerobic<br>Only Ba <sup>2+</sup>              | 1st   | n.a.                                          | (10.4±0.5)  | -                |             | 0.21±0.05                      | 96.3±0.3            | 3.7±0.3          | 1.06±0.21        | 5.9±0.5             | 94.1±0.5         |
|                                                                            | 2nd   | n.a.                                          | (10.5±0.3)  | -                |             | 0.22±0.03                      | 96.0±0.3            | 4.0±0.3          | 1.07±0.14        | 5.8±0.3             | 94.2±0.3         |
|                                                                            | 3rd   | n.a.                                          | (10.7±0.5)  | -                |             | 0.25±0.03                      | 95.5±0.4            | 4.5±0.4          | 1.17±0.14        | 6.1±0.0             | 93.9±0.0         |
|                                                                            | Total | n.a.                                          |             | -                |             |                                |                     |                  |                  |                     |                  |
| Newly formed <sup>d</sup><br>Aerobic<br>Ba <sup>2+</sup> /Mn <sup>2+</sup> | 1st   | 75.1±0.1                                      | (0.14±0.00) | >99              | (0.97±0.01) | 0.11±0.00                      | 61.9±0.1            | 39.9±0.1         | 1.98±0.01        | 11.3±0.0            | 88.8±0.0         |
|                                                                            | 2nd   | 62.3±0.9                                      | (0.15±0.00) | >99              | (0.99±0.00) | 0.23±0.00                      | 55.2±0.0            | 44.8±0.0         | 3.01±0.01        | 8.7±0.0             | 91.3±0.0         |
|                                                                            | 3rd   | 55.1±0.1                                      | (0.15±0.00) | >99              | (0.99±0.00) | 0.31±0.01                      | 41.7±1.2            | 58.3±1.2         | 4.20±0.04        | 7.2±0.0             | 92.8±0.0         |
|                                                                            | Total | 64.0±0.3                                      |             | >99              |             |                                |                     |                  |                  |                     |                  |
| Heated <sup>d</sup><br>Aerobic<br>Ba <sup>2+</sup> /Mn <sup>2+</sup>       | 1st   | 37.7±0.4                                      | (0.16±0.00) | 27.2±0.5         | (1.00±0.00) | 0.04±0.00                      | 79.8±0.2            | 20.2±0.2         | 1.14±0.00        | 15.9±0.1            | 84.1±0.1         |
|                                                                            | 2nd   | 9.4±0.6                                       | (0.16±0.00) | 12.1±0.2         | (1.01±0.00) | 0.05±0.00                      | 74.6±1.1            | 25.4±1.1         | 1.29±0.02        | 16.0±0.7            | 84.0±0.7         |
|                                                                            | 3rd   | 8.2±1.5                                       | (0.16±0.00) | 9.9±2.1          | (1.00±0.00) | 0.06±0.00                      | 76.3±0.5            | 23.7±0.5         | 1.35±0.00        | 16.1±0.1            | 83.9±0.1         |
|                                                                            | Total | 18.4±0.6                                      |             | 16.4±0.9         |             |                                |                     |                  |                  |                     |                  |
| Newly formed <sup>d</sup><br>Aerobic<br>Ba <sup>2+</sup> /Mn <sup>2+</sup> | 1st   | 27.0±0.5                                      | (0.93±0.01) | >99              | (0.97±0.01) | 0.27±0.00                      | 78.8±0.2            | 21.2±0.2         | 1.95±0.02        | 6.6±0.1             | 93.4±0.1         |
|                                                                            | 2nd   | 11.4±0.5                                      | (0.91±0.00) | >99              | (0.95±0.01) | 0.39±0.00                      | 65.2±0.5            | 34.8±0.5         | 2.95±0.03        | 5.3±0.5             | 94.7±0.5         |
|                                                                            | 3rd   | 10.0±0.3                                      | (0.93±0.01) | >99              | (0.97±0.01) | 0.52±0.00                      | 59.3±0.1            | 40.7±0.1         | 3.97±0.01        | 5.4±0.1             | 94.6±0.1         |
|                                                                            | Total | 16.1±0.0                                      |             | >99              |             |                                |                     |                  |                  |                     |                  |
| Heated <sup>d</sup><br>Aerobic<br>Ba <sup>2+</sup> /Mn <sup>2+</sup>       | 1st   | 6.0±0.4                                       | (1.02±0.00) | 12.3±1.3         | (0.99±0.01) | 0.10±0.00                      | 90.3±0.9            | 9.7±0.9          | 1.25±0.02        | 14.0±0.1            | 86.0±0.1         |
|                                                                            | 2nd   | <1                                            | (1.02±0.00) | 4.9±1.3          | (1.00±0.01) | 0.10±0.00                      | 87.4±0.6            | 12.6±0.6         | 1.21±0.00        | 14.0±0.1            | 86.0±0.1         |
|                                                                            | 3rd   | <1                                            | (1.03±0.00) | 5.4±1.8          | (1.00±0.00) | 0.13±0.00                      | 83.6±0.0            | 16.4±0.0         | 1.36±0.00        | 16.8±0.2            | 83.2±0.2         |
|                                                                            | Total | ~1.4                                          |             | 7.5±1.3          |             |                                |                     |                  |                  |                     |                  |

Newly formed or heated BMOs (1 mM as Mn) were treated thrice with solutions of Ba(NO<sub>3</sub>)<sub>2</sub> with or without 1 mM Mn(NO<sub>3</sub>)<sub>2</sub> in 20 mM HEPES (pH 7.0). Bathing solutions were renewed thrice every 24 h

**Table S1** Continued

| Condition                                                                  |       | Sequestration efficiency (%) (added ions; mM) |             |                  |             | Two-step extraction            |                     |                  |                  |                     |                  |
|----------------------------------------------------------------------------|-------|-----------------------------------------------|-------------|------------------|-------------|--------------------------------|---------------------|------------------|------------------|---------------------|------------------|
|                                                                            |       | Ba <sup>2+</sup>                              |             | Mn <sup>2+</sup> |             | Total Ba <sup>2+</sup><br>(mM) | Exchangeable<br>(%) | Reducible<br>(%) | Total Mn<br>(mM) | Exchangeable<br>(%) | Reducible<br>(%) |
| Newly formed <sup>d</sup><br>Aerobic<br>Ba <sup>2+</sup> /Mn <sup>2+</sup> | 1st   | 10.7±0.9                                      | (3.11±0.03) | >99              | (1.01±0.01) | 0.34±0.00                      | 78.8±0.7            | 21.2±0.7         | 2.05±0.01        | 5.5±0.2             | 94.6±0.2         |
|                                                                            | 2nd   | 4.2±0.9                                       | (3.08±0.02) | >99              | (1.00±0.01) | 0.38±0.00                      | 67.5±0.6            | 32.5±0.6         | 2.94±0.01        | 4.3±0.1             | 95.7±0.1         |
|                                                                            | 3rd   | 5.7±1.0                                       | (3.14±0.04) | >99              | (1.01±0.01) | 0.61±0.01                      | 55.9±0.6            | 44.1±0.6         | 3.92±0.02        | 4.0±0.2             | 96.0±0.2         |
|                                                                            | Total | 6.8±0.5                                       |             | >99              |             |                                |                     |                  |                  |                     |                  |
| Heated <sup>d</sup><br>Aerobic<br>Ba <sup>2+</sup> /Mn <sup>2+</sup>       | 1st   | 1.1±0.3                                       | (3.36±0.01) | 8.9±1.5          | (1.06±0.01) | 0.12±0.00                      | 89.8±0.3            | 10.2±0.3         | 1.20±0.01        | 13.0±0.1            | 87.0±0.1         |
|                                                                            | 2nd   | 1.5±0.2                                       | (3.37±0.01) | 5.5±3.2          | (1.08±0.03) | 0.16±0.00                      | 85.4±1.1            | 14.6±1.1         | 1.33±0.03        | 13.6±0.2            | 86.4±0.2         |
|                                                                            | 3rd   | 2.0±0.6                                       | (3.39±0.01) | 4.7±0.8          | (1.06±0.01) | 0.17±0.00                      | 82.1±0.5            | 17.9±0.5         | 1.37±0.03        | 15.3±1.2            | 84.7±1.2         |
|                                                                            | Total | 1.5±0.06                                      |             | 6.4±1.8          |             |                                |                     |                  |                  |                     |                  |
| Newly formed <sup>d</sup><br>Aerobic<br>Ba <sup>2+</sup> /Mn <sup>2+</sup> | 1st   | n.a.                                          | (11.0±1.1)  | >99              | (1.06±0.03) | 0.41±0.02                      | 80.1±1.1            | 19.9±1.1         | 2.21±0.08        | 5.7±0.2             | 94.3±0.2         |
|                                                                            | 2nd   | n.a.                                          | (10.1±0.1)  | >99              | (1.07±0.03) | 0.57±0.03                      | 68.4±2.9            | 31.6±2.9         | 3.26±0.15        | 4.9±0.2             | 95.1±0.2         |
|                                                                            | 3rd   | n.a.                                          | (10.8±0.2)  | >99              | (1.04±0.00) | 0.71±0.01                      | 55.6±1.8            | 44.4±1.8         | 4.13±0.07        | 4.6±0.2             | 95.4±0.2         |
|                                                                            | Total | n.a.                                          |             | >99              |             |                                |                     |                  |                  |                     |                  |
| Heated <sup>d</sup><br>Aerobic<br>Ba <sup>2+</sup> /Mn <sup>2+</sup>       | 1st   | n.a.                                          | (10.7±0.3)  | 6.3±0.8          | (1.01±0.02) | 0.15±0.01                      | 92.7±0.4            | 7.3±0.4          | 1.27±0.07        | 14.5±0.2            | 85.5±0.2         |
|                                                                            | 2nd   | n.a.                                          | (10.0±0.1)  | 8.5±5.6          | (1.00±0.00) | 0.17±0.06                      | 90.0±1.9            | 10.0±1.9         | 1.28±0.44        | 14.5±0.3            | 85.5±0.3         |
|                                                                            | 3rd   | n.a.                                          | (10.3±0.1)  | 10.5±1.0         | (1.02±0.00) | 0.20±0.01                      | 82.5±0.4            | 17.5±0.4         | 1.61±0.09        | 14.6±0.2            | 85.4±0.2         |
|                                                                            | Total | n.a.                                          |             | 8.4±2.0          |             |                                |                     |                  |                  |                     |                  |

**Table S2** Data summary of sequestration experiments for Sr<sup>2+</sup>, Ca<sup>2+</sup>, or Mg<sup>2+</sup> by newly formed BMOs with and without exogenous Mn<sup>2+</sup> in 20 mM HEPES at pH7.0.

| Condition                                                                  | Sequestration efficiency (%) (added ions; mM)        |      |                  |          |             | Two-step extraction                                             |                  |               |               |                  |               |
|----------------------------------------------------------------------------|------------------------------------------------------|------|------------------|----------|-------------|-----------------------------------------------------------------|------------------|---------------|---------------|------------------|---------------|
|                                                                            | Sr <sup>2+</sup> /Ca <sup>2+</sup> /Mg <sup>2+</sup> |      | Mn <sup>2+</sup> |          |             | Total Sr <sup>2+</sup> /Ca <sup>2+</sup> /Mg <sup>2+</sup> (mM) | Exchangeable (%) | Reducible (%) | Total Mn (mM) | Exchangeable (%) | Reducible (%) |
| Newly formed <sup>d</sup><br>Aerobic<br>Sr <sup>2+</sup> /Mn <sup>2+</sup> | 1st                                                  | n.a. | (11.3±0.4)       | >99      | (1.03±0.01) | 0.31±0.01                                                       | >99              | <1            | 2.19±0.06     | 8.1±0.3          | 91.9±0.3      |
|                                                                            | 2nd                                                  | n.a. | (12.0±0.5)       | >99      | (1.04±0.01) | 0.40±0.05                                                       | 99.0±0.2         | 1.0±0.2       | 3.15±0.23     | 8.2±0.1          | 91.8±0.1      |
|                                                                            | 3rd                                                  | n.a. | (11.4±0.5)       | >99      | (1.04±0.02) | 0.48±0.05                                                       | 98.1±0.3         | 1.9±0.3       | 3.98±0.01     | 9.4±0.4          | 90.6±0.4      |
|                                                                            | Total                                                |      |                  | >99      |             |                                                                 |                  |               |               |                  |               |
| Newly formed <sup>d</sup><br>Aerobic<br>Ca <sup>2+</sup> /Mn <sup>2+</sup> | 1st                                                  | n.a. | (11.8±2.5)       | 95.7±0.2 | (1.15±0.06) | 0.28±0.05                                                       | >99              | <1            | 2.17±0.13     | 9.8±0.3          | 90.2±0.3      |
|                                                                            | 2nd                                                  | n.a. | (11.0±0.2)       | 96.0±0.3 | (1.17±0.02) | 0.37±0.01                                                       | >99              | <1            | 3.25±0.11     | 9.2±0.2          | 90.8±0.2      |
|                                                                            | 3rd                                                  | n.a. | (11.1±0.3)       | 96.2±0.2 | (1.16±0.04) | 0.51±0.03                                                       | >99              | <1            | 4.30±0.10     | 10.1±0.2         | 89.9±0.2      |
|                                                                            | Total                                                |      |                  | 96.0±0.2 |             |                                                                 |                  |               |               |                  |               |
| Newly formed <sup>d</sup><br>aerobic<br>Mg <sup>2+</sup> /Mn <sup>2+</sup> | 1st                                                  | n.a. | (9.7±0.1)        | 98.5±0.1 | (1.11±0.03) | 0.18±0.03                                                       | 98.4±1.6         | 1.6±1.6       | 2.21±0.21     | 10.7±0.1         | 89.3±0.1      |
|                                                                            | 2nd                                                  | n.a. | (9.5±0.1)        | 98.5±0.1 | (1.07±0.00) | 0.37±0.02                                                       | 82.2±6.9         | 17.8±6.9      | 3.46±0.27     | 10.9±0.2         | 89.1±0.2      |
|                                                                            | 3rd                                                  | n.a. | (9.7±0.0)        | 98.6±0.0 | (1.10±0.03) | 0.41±0.01                                                       | 84.1±0.7         | 15.9±0.7      | 4.39±0.14     | 10.9±0.4         | 89.1±0.4      |
|                                                                            | Total                                                |      |                  | 98.5±0.1 |             |                                                                 |                  |               |               |                  |               |

Newly formed BMOs (1 mM as Mn) were treated thrice with mixed solutions of 10 mM Sr(NO<sub>3</sub>)<sub>2</sub>, Ca(NO<sub>3</sub>)<sub>2</sub>, or Mg(NO<sub>3</sub>)<sub>2</sub> with 1 mM Mn(NO<sub>3</sub>)<sub>2</sub> in 20 mM HEPES (pH 7.0). Bathing solutions were renewed thrice every 24 h. Sequestration efficiency was not analyzed (n.a.) due to no measurable difference in concentration before and after sequestration experiments.

**Table S3** Data summary of competitive sequestration experiments using newly formed BMOs (1 mM as Mn) in 10 mM HEPES buffer (pH 7.0) with and without exogenous Mn<sup>2+</sup>.

| Condition                                                                                      |       | Sequestration efficiency (%) (added ions; mM) |                                                      |                    | Two-step extraction         |                  |               |                                               |                  |               |               |                  |               |
|------------------------------------------------------------------------------------------------|-------|-----------------------------------------------|------------------------------------------------------|--------------------|-----------------------------|------------------|---------------|-----------------------------------------------|------------------|---------------|---------------|------------------|---------------|
|                                                                                                |       | Ba <sup>2+</sup>                              | Sr <sup>2+</sup> /Ca <sup>2+</sup> /Mg <sup>2+</sup> | Mn <sup>2+</sup>   | Total Ba <sup>2+</sup> (mM) | Exchangeable (%) | Reducible (%) | Total Ca <sup>2+</sup> /Mg <sup>2+</sup> (mM) | Exchangeable (%) | Reducible (%) | Total Mn (mM) | Exchangeable (%) | Reducible (%) |
| Newly formed <sup>d</sup> (mM)<br>Aerobic Ba <sup>2+</sup> /Sr <sup>2+</sup> /Mn <sup>2+</sup> | 1st   | 23.4±0.5<br>(1.00±0.00)                       | 5.5±0.4<br>(1.05±0.00)                               | >99<br>(1.00±0.00) | 0.33±0.01                   | 73.4±1.5         | 26.6±1.5      | 0.05±0.00                                     | >99              | <1            | 2.49±         | 9.6±0.2          | 90.4±0.2      |
|                                                                                                | 2nd   | 12.2±0.3<br>(0.99±0.00)                       | <1<br>(1.04±0.00)                                    | >99<br>(1.02±0.00) | 0.37±0.00                   | 59.7±0.3         | 40.3±0.3      | 0.03±0.00                                     | >99              | <1            | 3.07±         | 6.2±0.0          | 93.8±0.0      |
|                                                                                                | 3rd   | 7.4±0.4<br>(0.99±0.00)                        | <1<br>(1.01±0.00)                                    | >99<br>(0.98±0.01) | 0.49±0.00                   | 53.2±0.3         | 46.8±0.3      | 0.04±0.00                                     | >99              | <1            | 4.17±         | 6.0±0.1          | 94.0±0.1      |
|                                                                                                | Total | 14.4±0.3                                      | ~0.7                                                 | >99                |                             |                  |               |                                               |                  |               |               |                  |               |
| Newly formed <sup>d</sup> (mM)<br>Aerobic Ba <sup>2+</sup> /Sr <sup>2+</sup>                   | 1st   | 15.5±1.8<br>(1.04±0.00)                       | 2.7±1.6<br>(1.01±0.01)                               | -                  | 0.17±0.01                   | 95.2±0.1         | 4.8±0.1       | 0.04±0.00                                     | >99              | <1            | 0.99±0.10     | 7.7±0.2          | 92.3±0.2      |
|                                                                                                | 2nd   | 0.2±2.9<br>(1.04±0.02)                        | -0.8±2.7<br>(1.00±0.02)                              | -                  | 0.18±0.03                   | 97.3±0.5         | 2.7±0.5       | 0.04±0.01                                     | >99              | <1            | 0.98±0.15     | 8.0±0.5          | 92.0±0.5      |
|                                                                                                | 3rd   | -3.5±2.7<br>(1.04±0.04)                       | -2.4±3.2<br>(0.99±0.04)                              | -                  | 0.17±0.01                   | 94.4±0.1         | 5.6±0.1       | 0.03±0.00                                     | >99              | <1            | 0.99±0.06     | 6.1±0.1          | 93.9±0.1      |
|                                                                                                | Total | ~4.0                                          | ~0.2                                                 |                    |                             |                  |               |                                               |                  |               |               |                  |               |
| Newly formed <sup>d</sup> (mM)<br>Aerobic Ba <sup>2+</sup> /Ca <sup>2+</sup> /Mn <sup>2+</sup> | 1st   | 22.8±2.8<br>(1.02±0.02)                       | 2.7±0.2<br>(0.94±0.02)                               | >99<br>(1.02±0.02) | 0.22±0.03                   | 80.8±4.4         | 19.2±4.4      | 0.03±0.01                                     | 98.5±2.2         | 1.5±2.2       | 1.97±0.25     | 8.7±0.9          | 91.3±0.9      |
|                                                                                                | 2nd   | 10.6±1.2<br>(0.98±0.01)                       | n.d.<br>(0.92±0.02)                                  | >99<br>(1.00±0.01) | 0.36±0.02                   | 67.6±2.1         | 32.4±2.1      | 0.04±0.00                                     | 98.5±0.8         | 1.5±0.8       | 3.07±0.14     | 7.1±0.2          | 92.9±0.2      |
|                                                                                                | 3rd   | 8.2±2.3<br>(0.99±0.01)                        | n.d.<br>(0.93±0.01)                                  | >99<br>(1.02±0.00) | 0.46±0.03                   | 60.0±3.4         | 40.0±3.4      | 0.04±0.00                                     | 94.5±3.5         | 5.5±3.5       | 9.96±0.23     | 8.3±0.1          | 91.7±0.1      |
|                                                                                                | Total | 13.9±1.5                                      | n.d.                                                 | >99                |                             |                  |               |                                               |                  |               |               |                  |               |
| Newly formed <sup>d</sup> (mM)<br>Aerobic Ba <sup>2+</sup> /Ca <sup>2+</sup>                   | 1st   | 16.7±2.6<br>(1.00±0.03)                       | n.d.<br>(0.94±0.01)                                  | -                  | 0.17±0.03                   | 96.0±0.7         | 4.0±0.7       | 0.04±0.01                                     | >99              | <1            | 1.10±0.15     | 7.8±0.2          | 92.2±0.2      |
|                                                                                                | 2nd   | n.d.<br>(0.99±0.01)                           | n.d.<br>(0.92±0.00)                                  | -                  | 0.17±0.01                   | 95.6±0.2         | 4.4±0.2       | 0.03±0.00                                     | >99              | <1            | 1.05±0.06     | 7.3±0.2          | 92.7±0.2      |
|                                                                                                | 3rd   | n.d.<br>(0.99±0.00)                           | n.d.<br>(0.93±0.01)                                  | -                  | 0.19±0.00                   | 96.1±0.2         | 3.9±0.2       | 0.04±0.00                                     | 97.1±2.6         | 2.9±2.6       | 1.11±0.02     | 10.4±0.2         | 89.6±0.2      |
|                                                                                                | Total | n.d.                                          | n.d.                                                 |                    |                             |                  |               |                                               |                  |               |               |                  |               |
| Newly formed <sup>d</sup> (mM)<br>Aerobic Ba <sup>2+</sup> /Mg <sup>2+</sup> /Mn <sup>2+</sup> | 1st   | 25.3±1.6<br>(1.02±0.02)                       | n.d.<br>(1.07±0.01)                                  | >99<br>(1.03±0.01) | 0.25±0.01                   | 77.4±1.0         | 22.6±1.0      | 0.02±0.00                                     | >99              | <1            | 2.10±0.07     | 7.6±0.2          | 92.4±0.2      |
|                                                                                                | 2nd   | 10.9±1.0<br>(0.98±0.01)                       | n.d.<br>(1.05±0.01)                                  | >99<br>(1.02±0.01) | 0.38±0.02                   | 67.3±3.6         | 32.7±3.6      | 0.02±0.00                                     | >99              | <1            | 2.99±0.20     | 7.6±0.4          | 92.4±0.4      |
|                                                                                                | 3rd   | 8.7±0.4<br>(0.99±0.01)                        | n.d.<br>(1.05±0.00)                                  | >99<br>(1.03±0.01) | 0.48±0.01                   | 58.5±1.7         | 41.5±1.7      | 0.02±0.00                                     | >99              | <1            | 4.10±0.11     | 6.9±0.3          | 93.1±0.3      |
|                                                                                                | Total | 14.9±0.6                                      | n.d.                                                 | >99                |                             |                  |               |                                               |                  |               |               |                  |               |
| Newly formed <sup>d</sup> (mM)<br>Aerobic Ba <sup>2+</sup> /Mg <sup>2+</sup>                   | 1st   | 16.7±2.6<br>(1.00±0.03)                       | n.d.<br>(1.07±0.01)                                  | -                  | 0.17±0.01                   | 96.3±0.2         | 3.7±0.2       | 0.03±0.00                                     | >99              | <1            | 1.10±0.08     | 7.1±0.0          | 92.9±0.0      |
|                                                                                                | 2nd   | n.d.<br>(0.99±0.01)                           | n.d.<br>(1.03±0.06)                                  | -                  | 0.16±0.02                   | 96.8±0.2         | 3.2±0.2       | 0.03±0.00                                     | >99              | <1            | 0.97±0.08     | 8.4±0.3          | 91.6±0.3      |
|                                                                                                | 3rd   | n.d.<br>(0.99±0.00)                           | n.d.<br>(1.06±0.01)                                  | -                  | 0.17±0.01                   | 96.5±0.3         | 3.5±0.3       | 0.03±0.00                                     | >99              | <1            | 1.03±0.09     | 8.7±0.1          | 91.3±0.1      |
|                                                                                                | Total | n.d.                                          | n.d.                                                 |                    |                             |                  |               |                                               |                  |               |               |                  |               |

Newly formed BMOs were treated thrice with mixtures of 1 mM Ba(NO<sub>3</sub>)<sub>2</sub> with 1 mM Sr(NO<sub>3</sub>)<sub>2</sub>, Ca(NO<sub>3</sub>)<sub>2</sub>, or Mg(NO<sub>3</sub>)<sub>2</sub> in 20 mM HEPES (pH 7.0) with and without exogenous Mn<sup>2+</sup>. Bathing solutions were renewed thrice every 24 h.

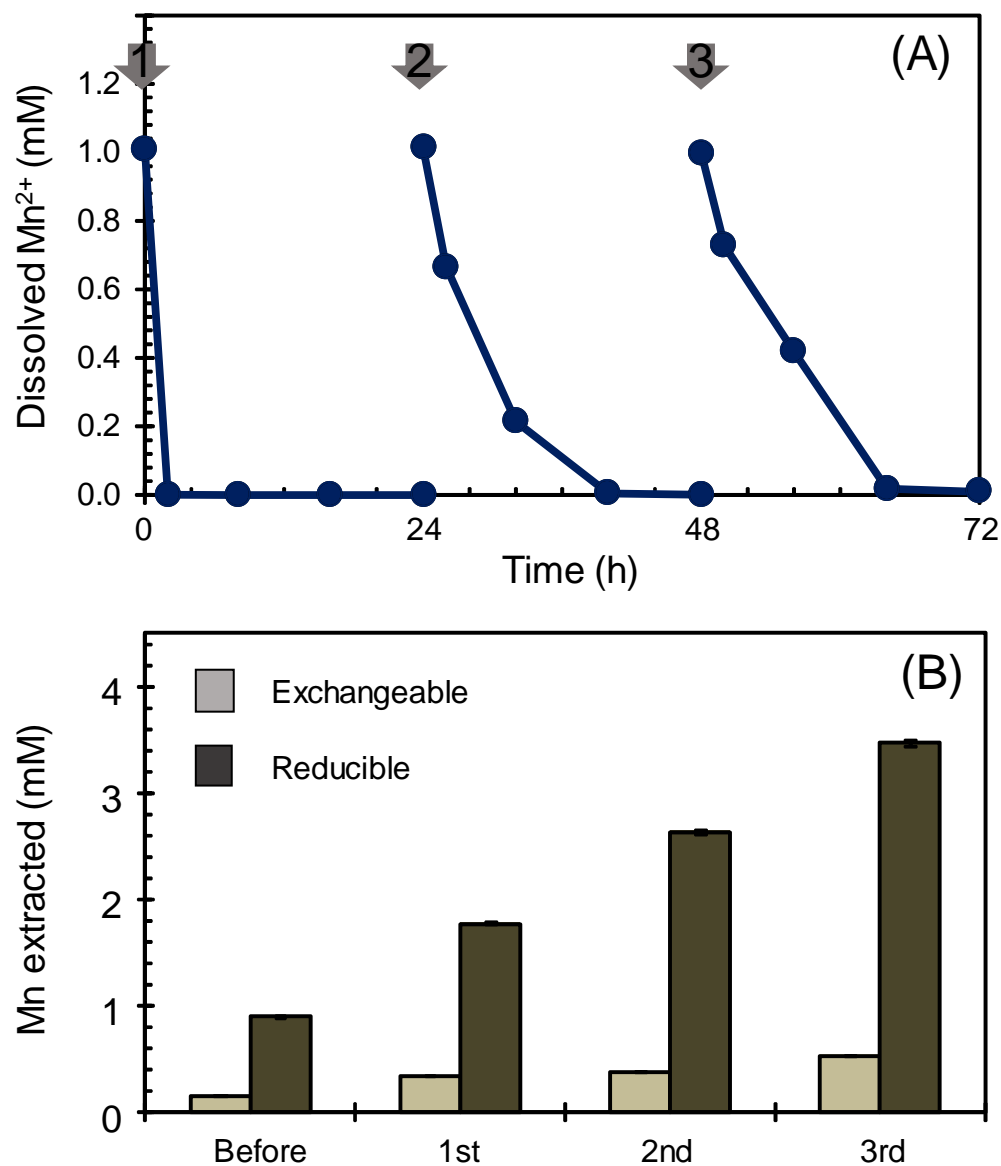

**Figure S1**  $Mn^{2+}$  oxidation by newly formed biogenic manganese oxides (1 mM) in 1 mM  $Mn(NO_3)_2$  in 20 mM HEPES (pH 7.0). (A) Dissolved  $Mn^{2+}$  and (B) exchangeable and reducible Mn in the solid phases assessed via two-step extraction. The bathing solutions were renewed every 24 h (indicated by arrows). Error bars represent standard deviations ( $n = 3$ ).

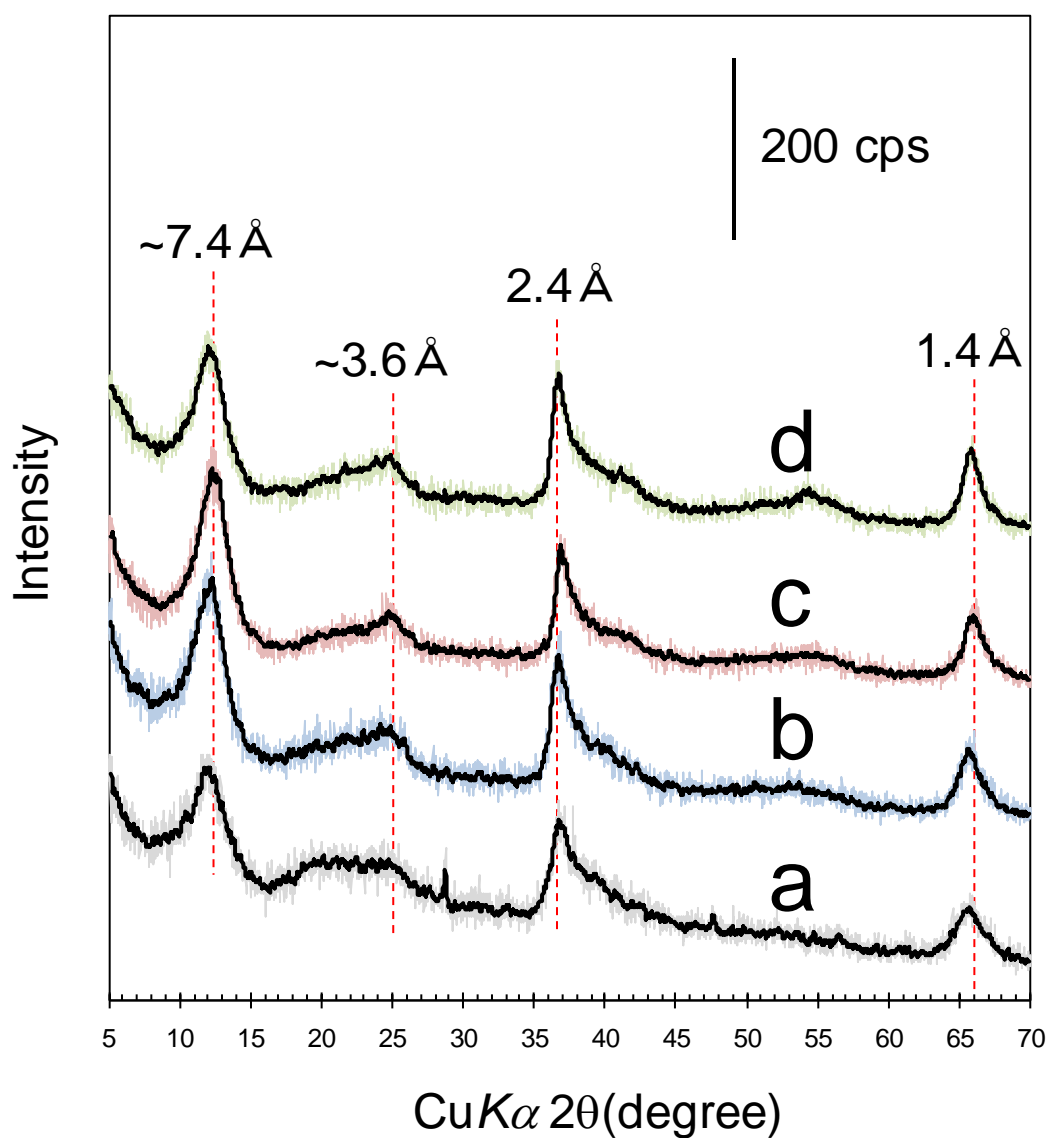

**Figure S2** X-ray diffraction patterns of newly formed biogenic manganese oxides (1 mM as Mn) (a) not treated and treated with 1 mM  $\text{Mn}(\text{NO}_3)_2$  in 20 mM HEPES (pH 7.0) (b) one, (c) two, and (d) three times, along with renewal of the bathing solutions every 24 h.

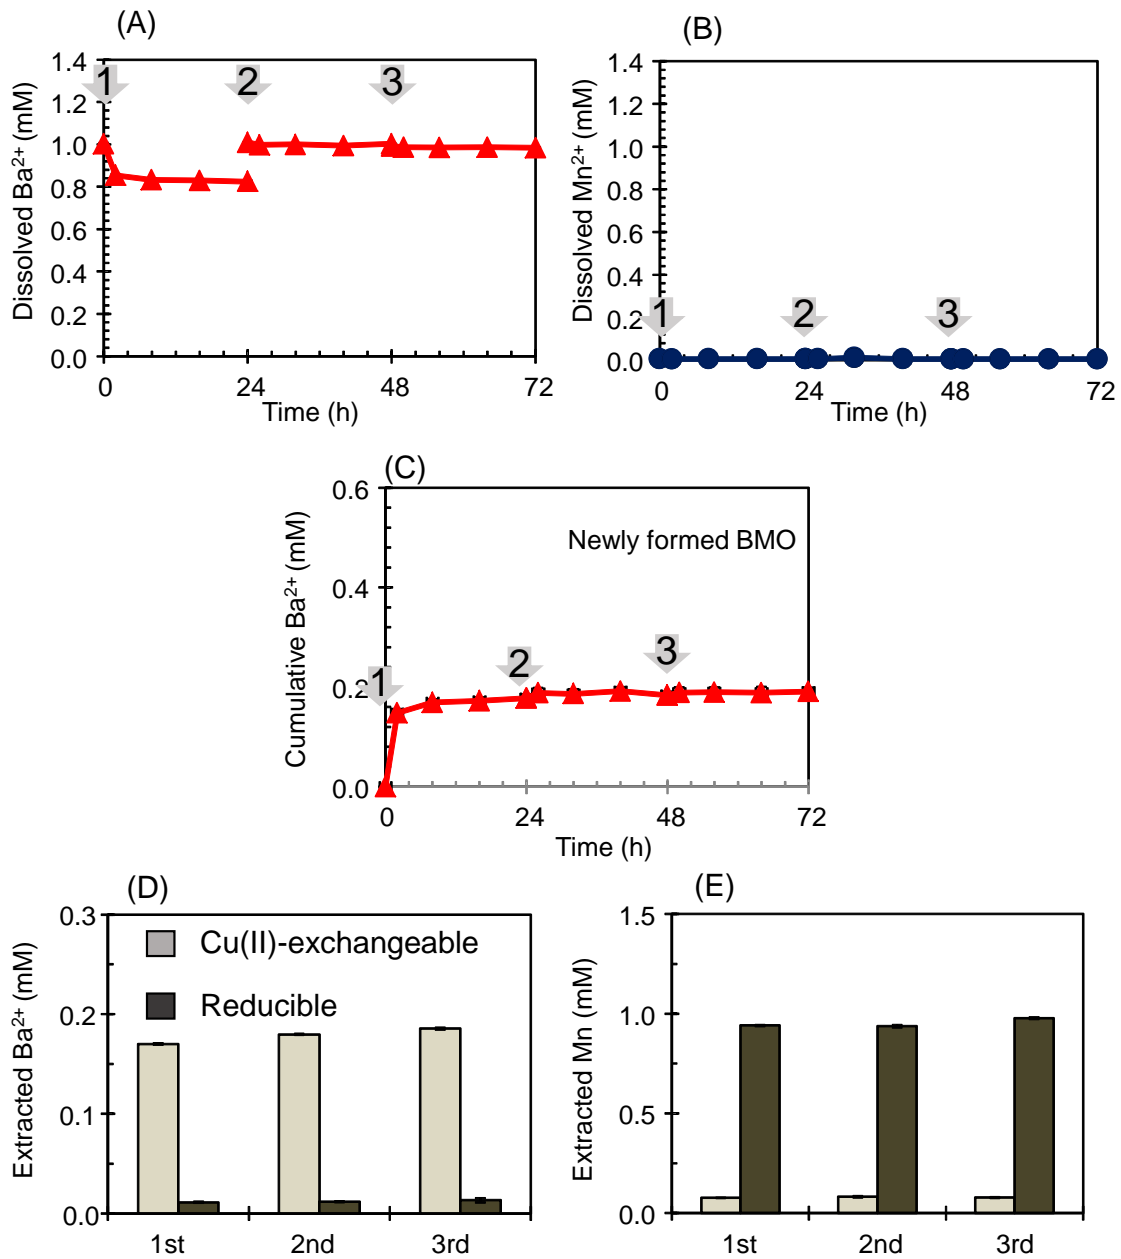

**Figure S3** Repeated treatment of newly formed biogenic manganese oxides (1 mM) in 1 mM Ba(NO<sub>3</sub>)<sub>2</sub> in 20 mM HEPES (pH 7.0). (A) Dissolved Ba<sup>2+</sup>, (B) dissolved Mn<sup>2+</sup>, and (C) cumulative Ba<sup>2+</sup> sequestration. The bathing solutions were renewed every 24 h (indicated by arrows). Exchangeable and reducible (D) Ba and (E) Mn in the solid phases measured via two-step extraction. Error bars represent standard deviations (n = 3).



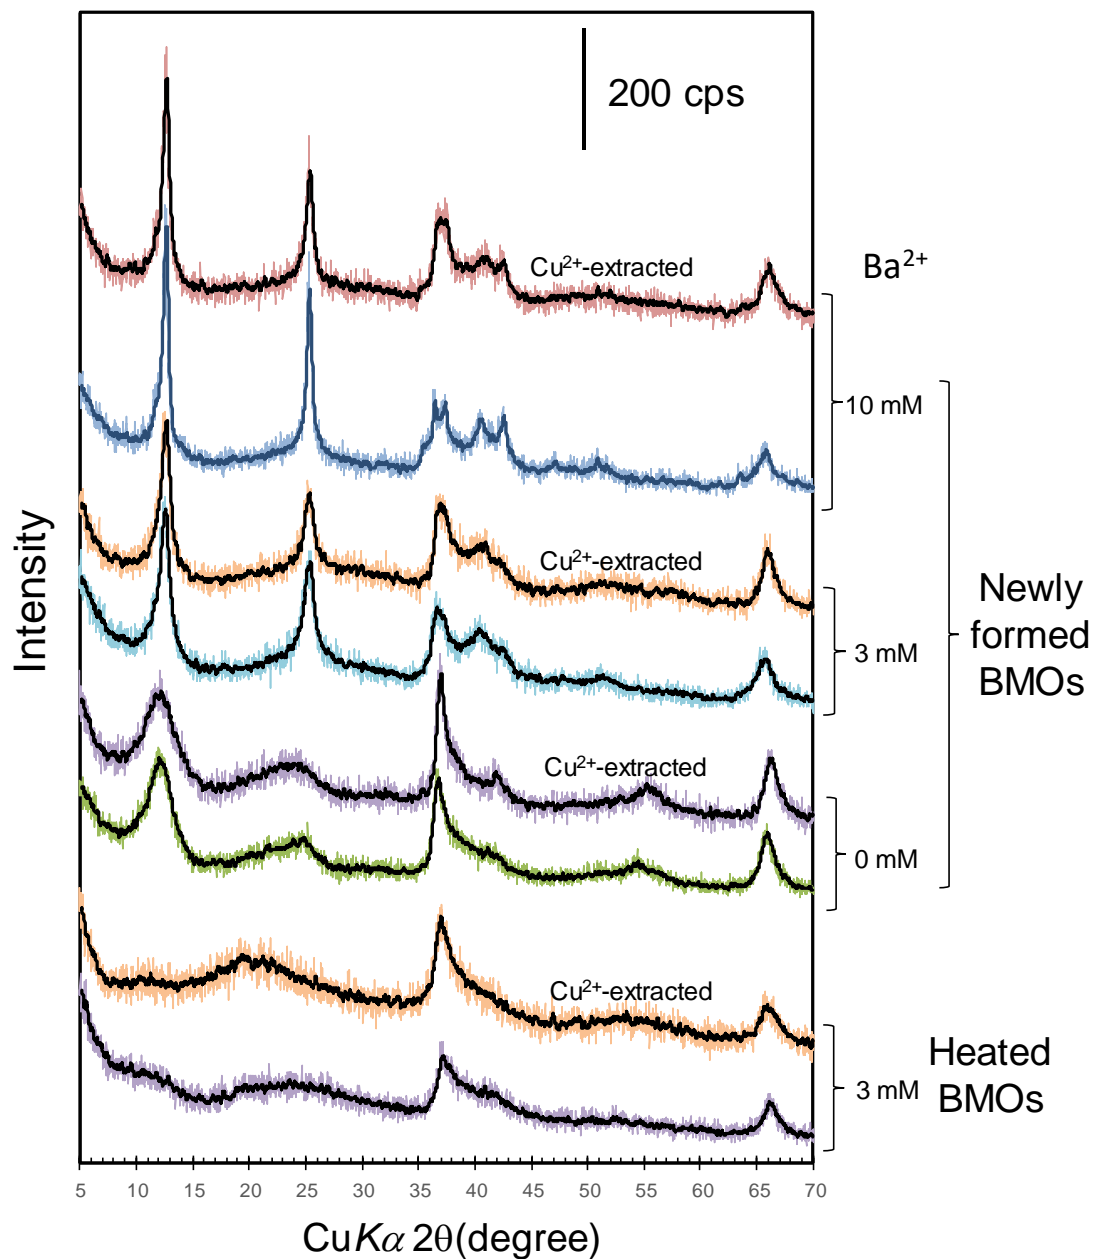

**Figure S4** Effect of  $\text{Cu}^{2+}$ -extraction on X-ray diffraction (XRD) patterns. XRD analysis of newly formed and heated biogenic manganese oxides (1 mM as Mn) treated thrice with mixed solutions of  $\text{Ba}(\text{NO}_3)_2$  (0–10 mM) with 1 mM  $\text{Mn}(\text{NO}_3)_2$  in 20 mM HEPES (pH 7.0), along with the renewal of the bathing solutions every 24 h and subsequently extracted with 10 mM  $\text{Cu}(\text{NO}_3)_2$  for 24 h.

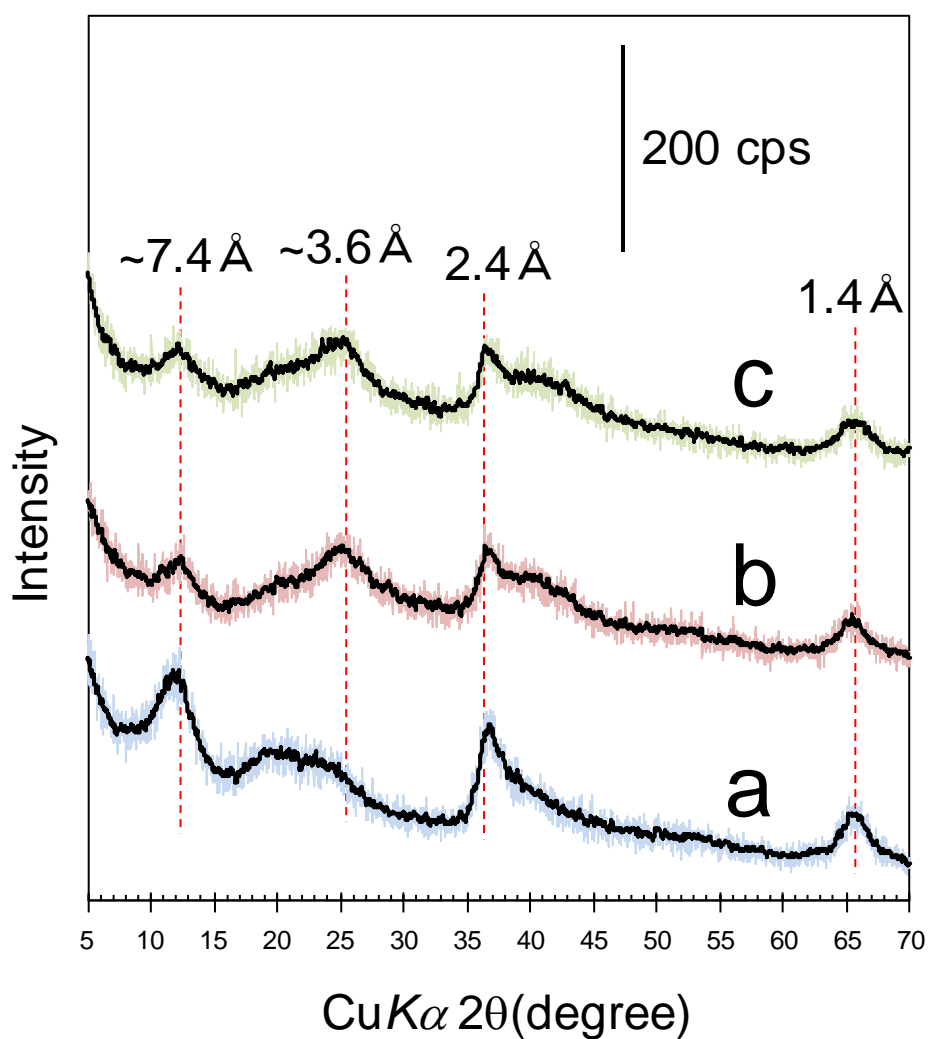

**Figure S5** X-ray diffraction patterns of newly formed biogenic manganese oxides (1 mM as Mn) (a) not treated and treated thrice with (b) 1 mM and (c) 10 mM  $\text{Ba}(\text{NO}_3)_2$  in 20 mM HEPES (pH 7.0). Bathing solutions were renewed every 24 h.

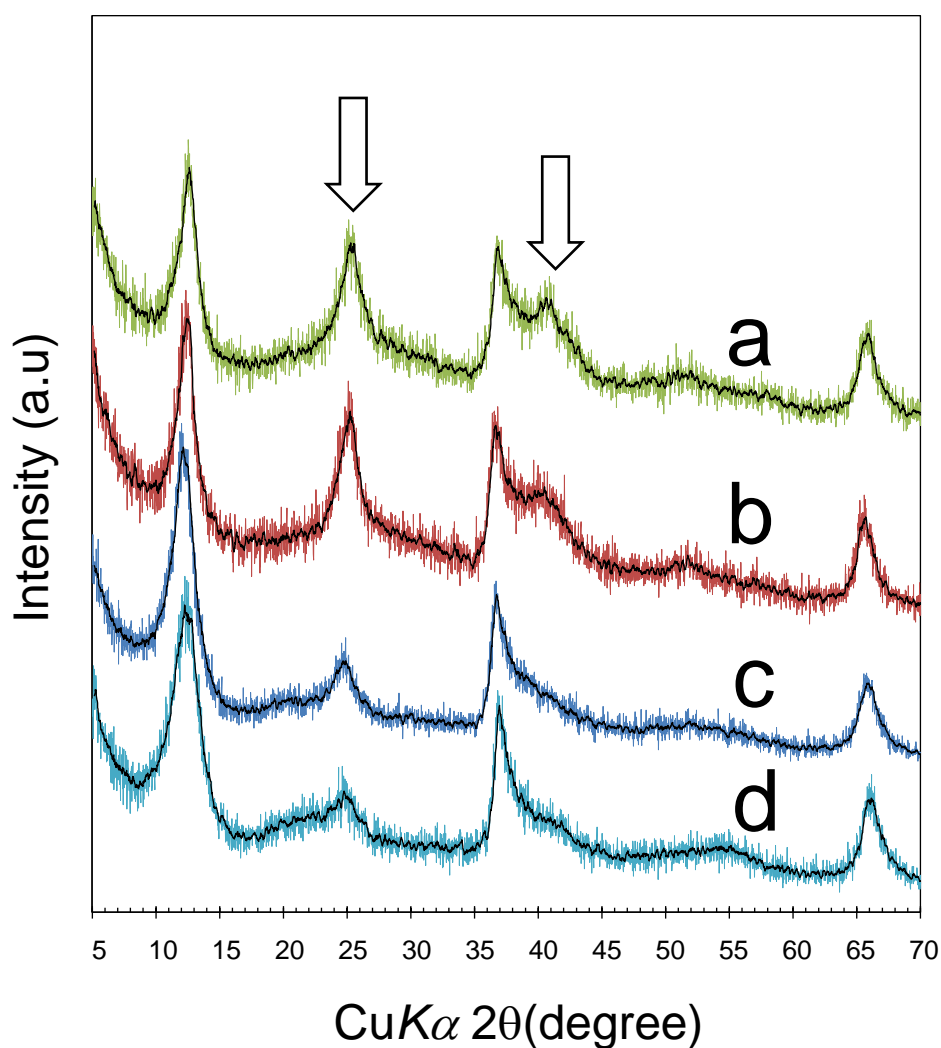

**Figure S6** X-ray diffraction patterns of newly formed biogenic manganese oxides (1 mM as Mn) treated thrice in exogenous 1 mM  $\text{Mn}(\text{NO}_3)_2$  with (a) 1 mM  $\text{Ba}(\text{NO}_3)_2$ , (b) 1 mM  $\text{Ba}(\text{NO}_3)_2$  + 1 mM  $\text{Sr}(\text{NO}_3)_2$  and (c) 1 mM  $\text{Sr}(\text{NO}_3)_2$ , and (d) without neither  $\text{Ba}(\text{NO}_3)_2$  nor  $\text{Sr}(\text{NO}_3)_2$  in 20 mM HEPES (pH 7.0). Bathing solutions were renewed every 24 h. XRD pattern for BMO treated with 1 mM  $\text{Ba}(\text{NO}_3)_2$  + 1 mM  $\text{Sr}(\text{NO}_3)_2$  is resemble to that with 1 mM  $\text{Ba}(\text{NO}_3)_2$ , but not with 1 mM  $\text{Sr}(\text{NO}_3)_2$ , especially in the parts suggested by the arrows.
